# Supplementary material for: Neurobehavioral and Antioxidant Effects of Ethanolic Extract of Yellow Propolis
Source: Oxid Med Cell Longev. 2016 Oct 16;2016:2906953. doi: 10.1155/2016/2906953 (PMC5086397; doi:10.1155/2016/2906953)
Supplement: Supplementary file 1 — Supplementary Material reports GC – MS data obtained for a sample of yellow Brazilian propolis and 1H-NMR data of lupeol, the most abundant triterpene in this yellow propolis. [file 2906953.f1.docx]

**Supplementary Material**

NEUROBEHAVIORAL AND ANTIOXIDANT EFFECTS OF ETHANOLIC EXTRACT OF YELLOW PROPOLIS

Cinthia Cristina Sousa de Menezes da Silveiraa, Luanna Melo Pereira Fernandesa,b, Mallone Lopes da Silvaa, Diandra Araújo Luza, Antônio Rafael Quadro Gomesa, Marta Chagas Monteiroa,b, Christiane Schineider Machadod, Yohandra Reyes Torresd, Tatiana Onofre de Lirae, Antonio Gilberto Ferreirae, Enéas Andrade Fontes-Júniora,b,c, Cristiane Socorro Ferraz Maiaa,b,c*

**Tabel 1S – Relative percentage of triterpenes identified by GC – MS (electron ionization) in a yellow Brazilian propolis extract.**

| *tR*(min) | Compounds | Relative composition (%) |
| --- | --- | --- |
| 12.5 | Lanosterol | 3.41 |
| 12.6 | 9,19-Cyclolanost-7-en-3-ol | 1.39 |
| 13.5 | *β*- Amyrin | 13.64 |
| 13.8 | Lup-20(29)-en-3-ona | 11.79 |
| 14.0 | Lupeol | 44.80 |
| 14.9 | Olean-12-en-3 one | 6.35 |
| 15.0 | Olean-12-en-3-yl acetate | 2.97 |
| 15.1 | Olean-18-en-3-ol | 2.10 |
| 15.6 | 13,27-cycloursan-3-ol (3*β*, 13*β*,14*β*) acetate | 6.09 |
|  | Unidentified compounds | 6.73 |

**TABLE 2S –Comparison of 1H-NMR data of lupeol (δppm, m, *J* Hz*,* at 600 MHz, solvent D2O+CD3OD) in yellow propolis and 1H-NMR data from literature.**

| Position | 1H-NMR | 1H-NMR a | 1H-NMR b | 1H-NMR c | 1H-NMRd |
| --- | --- | --- | --- | --- | --- |
| 1 |  |  |  |  |  |
| 2 |  |  |  |  |  |
| 3 | 3.14 (dd, *J*= 11.19; 4.55 Hz) | 3.18 (1H, dd) | 3.16 (1H, dd) | 3.18 (dd) |  |
| 4 |  |  |  |  |  |
| 5 |  |  |  |  |  |
| 6 |  |  |  |  |  |
| 7 |  |  |  |  |  |
| 8 |  |  |  |  |  |
| 9 |  |  |  |  |  |
| 10 |  |  |  |  |  |
| 11 |  |  |  |  |  |
| 12 |  |  |  |  |  |
| 13 | 1.90 (m) |  | 1.89 (1H, m) | 1.67 (t) | 1.68 (m) |
| 14 |  |  |  |  |  |
| 15 |  |  |  |  |  |
| 16 |  |  |  |  |  |
| 17 |  |  |  |  |  |
| 18 |  |  |  |  |  |
| 19 | 2.40 (m) | 2.38 (1H, m) | 2.35 (1H, m) | 2.39 (m) | 2.37 (m) |
| 20 |  |  |  |  |  |
| 21 |  |  |  |  |  |
| 22 |  |  |  |  |  |
| 23 | 0.76 (s) | 0.76 (3H, s) | 0.73 (3H, s) | 0.98 (s) |  |
| 24 | 0.82 (s) | 0.79 (3H, s) | 0.76 (3H, s) | 0.77 (s) |  |
| 25 | 0.86 (s) | 0.83 (3H, s) | 0.80 (3H, s) | 0.84 (s) | 0.85 (s) |
| 26 | 0.95 (s) | 0.94 (3H, s) | 0.91 (3H, s) | 1.04 (s) | 1.08 (s) |
| 27 | 0.97 (s) | 0.97 (3H, s) | 0.94 (3H, s) | 0.97 (s) | 0.97 (s) |
| 28 | 1.06 (s) |  | 1.01 (3H, s) | 0.79 (s) | 0.80 (s) |
| 29 | 4.58 (m); 4.69 (d) | 4.57; 4.68 (d) | 4.53; 4.65 (2H, s) | 4.58 (m); 4.69 (m) | 4.58 (s); 4.70 (s) |
| 30 | 1.70 (s) | 1.68 (3H, s) | 1.65 (3H, s) | 1.69 (s) | 1.70 (s) |

a Data reported by Marinho 2008 (CDCl3; 500 MHz), b Maldaner 2005 (CDCl3; 400 MHz), c Reynolds et al., (1986) and d de Albuquerque et al., (2007).

Albuquerque, I.L., Alves, L.A., Lemos, T.L.G., Monte, F.J. Q. 2007. Ácido canárico (3, 4-*seco* derivado do lupano) em própolis do Ceará. Quím Nova, 30, 828-831.

Maldaner, G. 2005. Estudos dos metabólitos secundários de *Condalia Buxifolia* e *Scutia Buxifolia* e suas atividades antimicrobiana, Master Thesis, Universidade Federal de Santa Maria.

Marinho, R.O.S. 2008. Estudo fitoquimico da especie B*yrsonima sericea* e sua aplicacao em dermocosmética, Master Thesis, Faculdade de Farmácia da Universidade Federal do Rio de Janeiro, Ciências Farmacêuticas.

Reynolds, W.F., McLean, S., Poplawski, J., Enriquez, R.G., Escobar, L.I., Leon, I. 1986. Tetrahedron 42, 3419-3428.
